# Supplementary material
Source: PubMed Central journal article supplement (PMC4054278)
Supplement: EC.00317-13_zek999094284so1.pdf [file EC.00317-13_zek999094284so1.pdf]

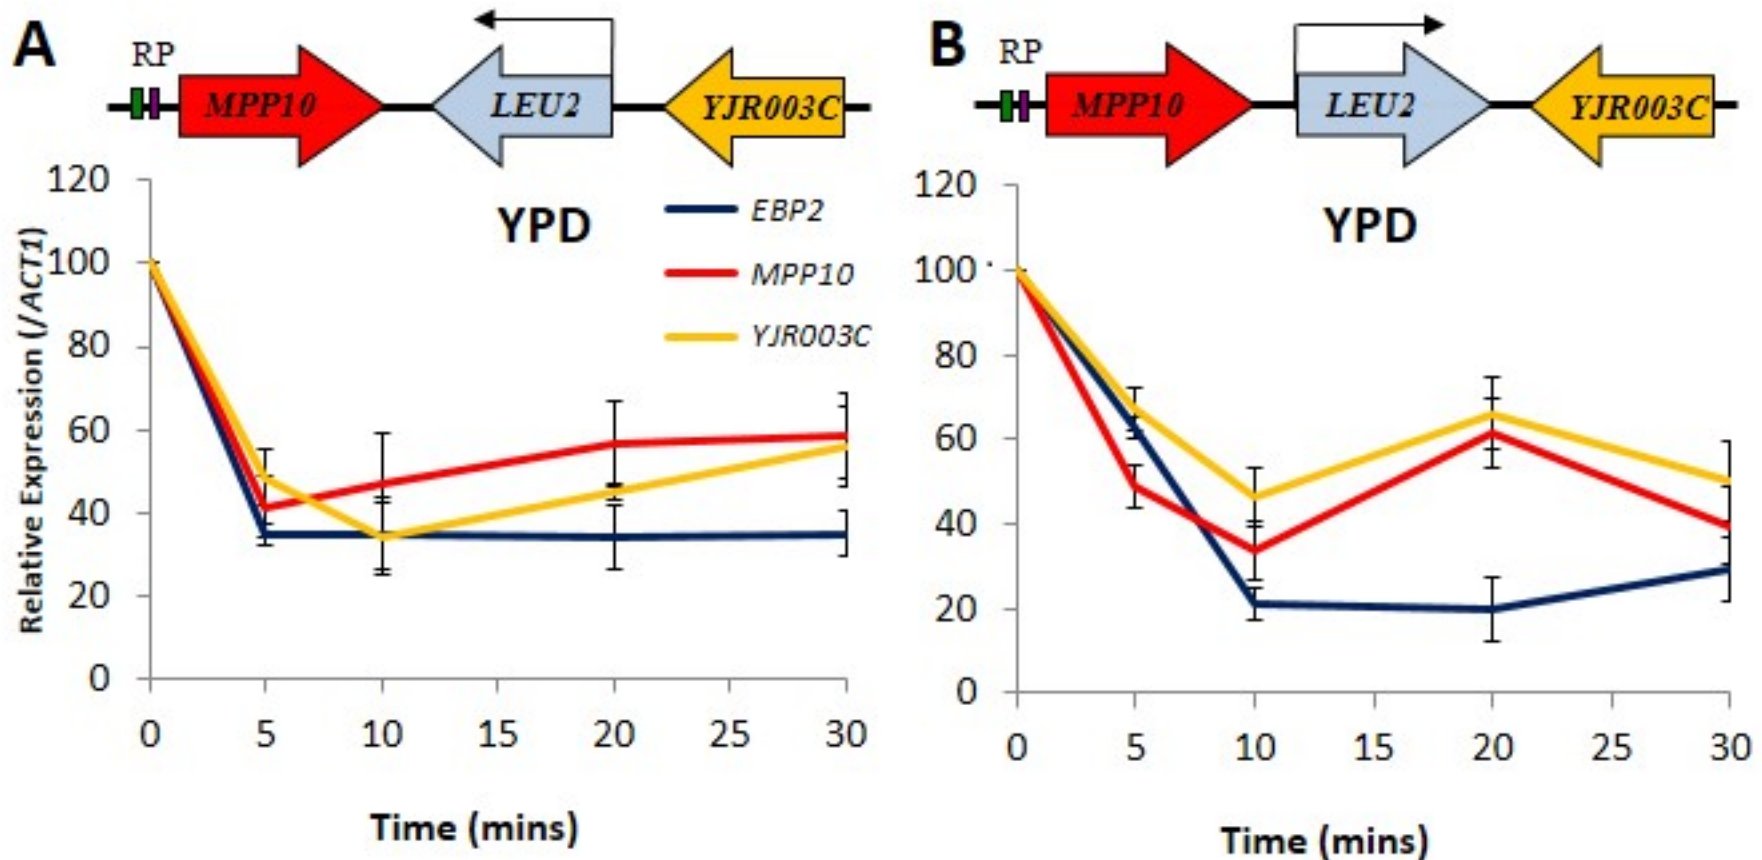

**Supplemental Figure 1. Insertions of active RNA pol II transcribed genes can abrogate AGC.** Strains were grown in YPD media, subjected to a 37°C heat shock, and monitored for their expression profiles at the *EBP2*, *MPP10*, and *YJR003C* genes by RT-PCR. The profiles of the leftward oriented *MPP10.LEU2* insert (YMM554) and rightward oriented *MPP10.LEU2* insert (YMM559) are presented in A and B respectively.

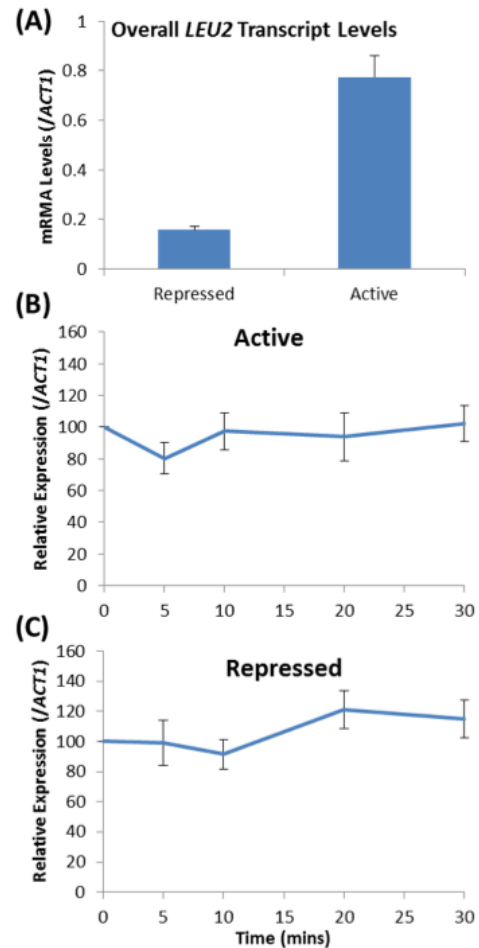

**Supplemental Figure 2. The inserted *LEU2* gene is not subject to heat shock.** Strain YMM554 (*MPP10.LEU2*) was grown in either SC-leucine (active conditions) or YPD media (repressed conditions), subjected to a 37°C heat shock, and monitored for *LEU2* expression by RT-PCR. Overall expression levels in the two conditions are presented at the zero time in A), and over the heat shock time course in B), and C).

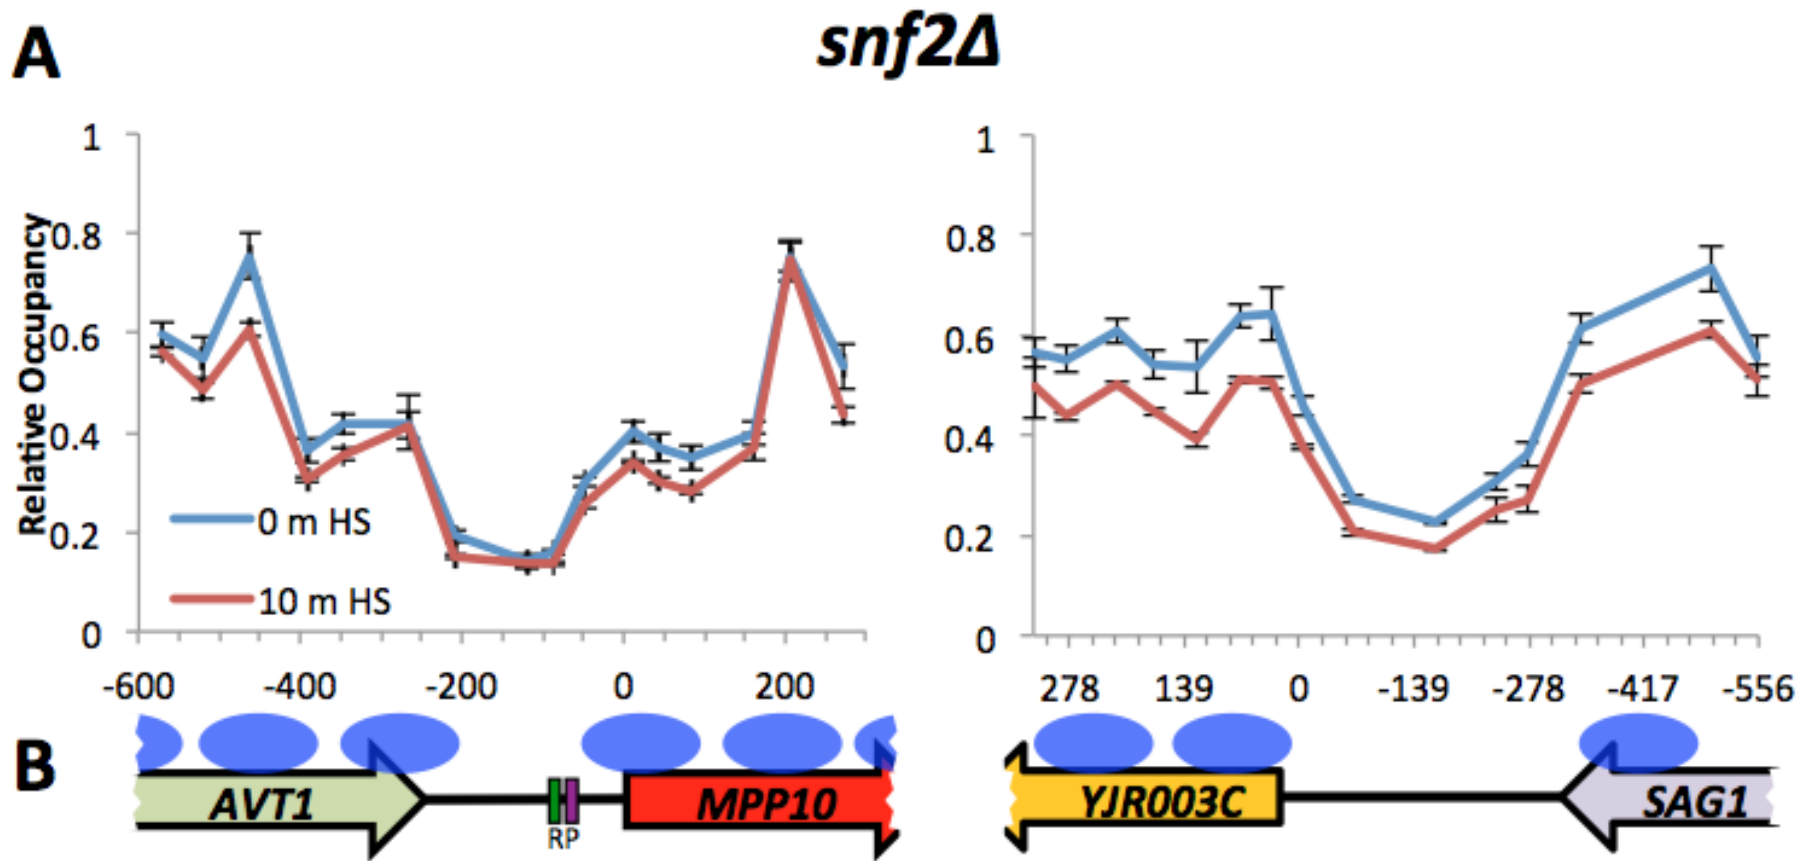

**Supplemental Figure 3. Nucleosome mapping at the *MPP10* and *YJR003C* promoter regions in a *snf2Δ* mutant.** A) Nucleosome positions were determined across both the *MPP10* and *YJR003C* promoters by a nucleosome scanning assay in the *snf2Δ* mutant strain YMM593 before and after a 10 min heat shock at 37°C. B) Previously published nucleosome positions at the *MPP10* and *YJR003C* promoters as determined by ChIP are represented as blue ovals (35).
